# Supplementary material
Source: PubMed Central journal article supplement (PMC7394342)
Supplement: NIHMS1600366-supplement-supp1-2958256.pdf [file NIHMS1600366-supplement-supp1-2958256.pdf]

# Supplementary to Optimized Combination of Multiple Graphs with Application to the Integration of Brain Imaging and (epi)Genomics Data

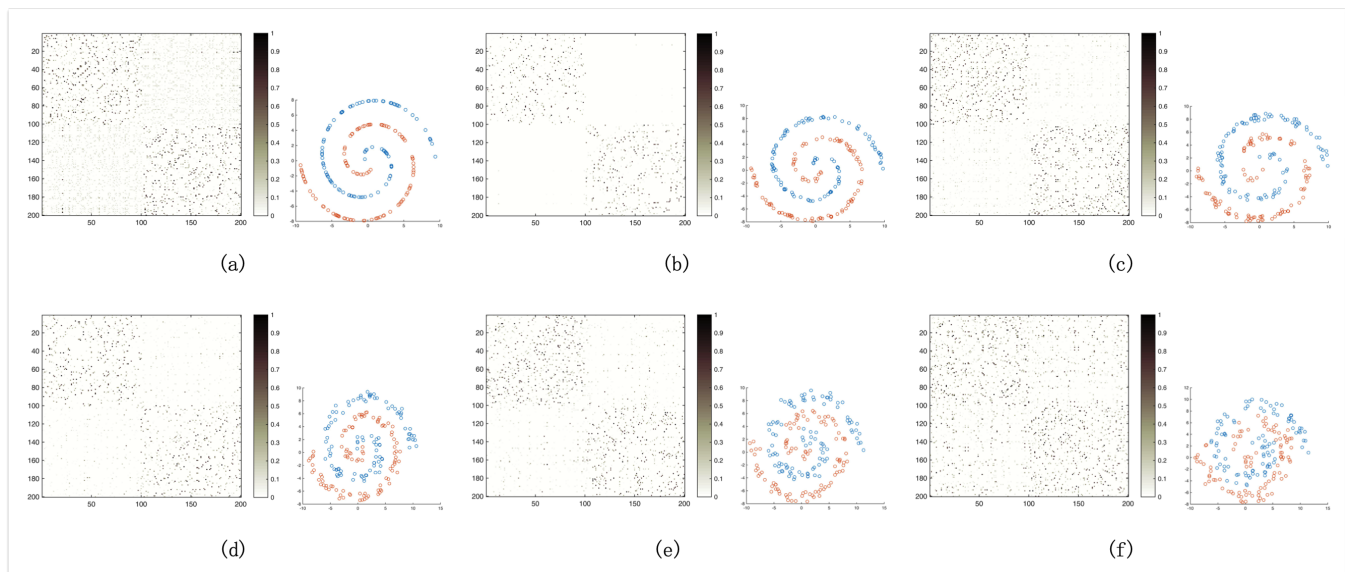

Figure S1: The simulated two-spiral pattern toy dataset. From (a) to (f): the noise levels  $L$  are successively 0,0.5,1,1.5,2,and 2.5; left figures are the similarity matrix calculated using Equation (11), and right figures are visualizations of the two-dimensional data, where two different colors represent the binary phenotypes.

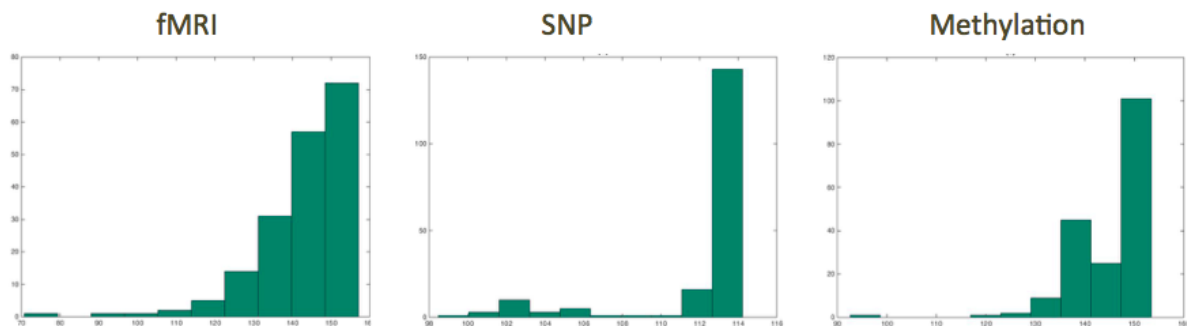

Figure S2: Histograms of vector  $D$  calculated from similarity matrices extracted from MCIC data constructed with bandwidth  $\epsilon_{\text{connected}}$ . From left to right is histogram from fMRI, SNP and DNA methylation data respectively. Denoting the minimum value in  $D$  as  $D_{lb}$  and maximum value as  $D_{ub}$ , the range of values for parameter  $\delta$  (which equals  $1/c$ ) to choose from is  $0.5D_{lb} \sim 0.5(D_{lb} + D_{ub})$ . The value is then determined from this range based on test accuracy in cross validation.

Table S1: ROIs (defined by automated anatomical labeling (AAL) template) selected for further investigation on Schizophrenia classification.

| Region ID | Anatomical Region                   |
|-----------|-------------------------------------|
| 3         | Left Superior Frontal Gyrus         |
| 61        | Left Inferior Parietal Lobule       |
| 35, 36    | Bilateral Posterior Cingulate Gyrus |
| 78        | Right Thalamus                      |
| 91 ~ 108  | Cerebellum                          |
| 26        | Right Medial Orbitofrontal Cortex   |
| 29, 30    | Bilateral Insula                    |
| 57        | Left Postcentral Gyrus              |
| 67, 68    | Bilateral Precuneus                 |
| 81, 82    | Bilateral Superior Temporal Gyrus   |
| 85, 86    | Bilateral Middle Temporal Gyrus     |
| 89, 90    | Bilateral Inferior Temporal Gyrus   |
| 41        | Left Amygdala                       |
| 47, 48    | Bilateral Lingual Gyrus             |
| 73, 74    | Bilateral Putamen                   |

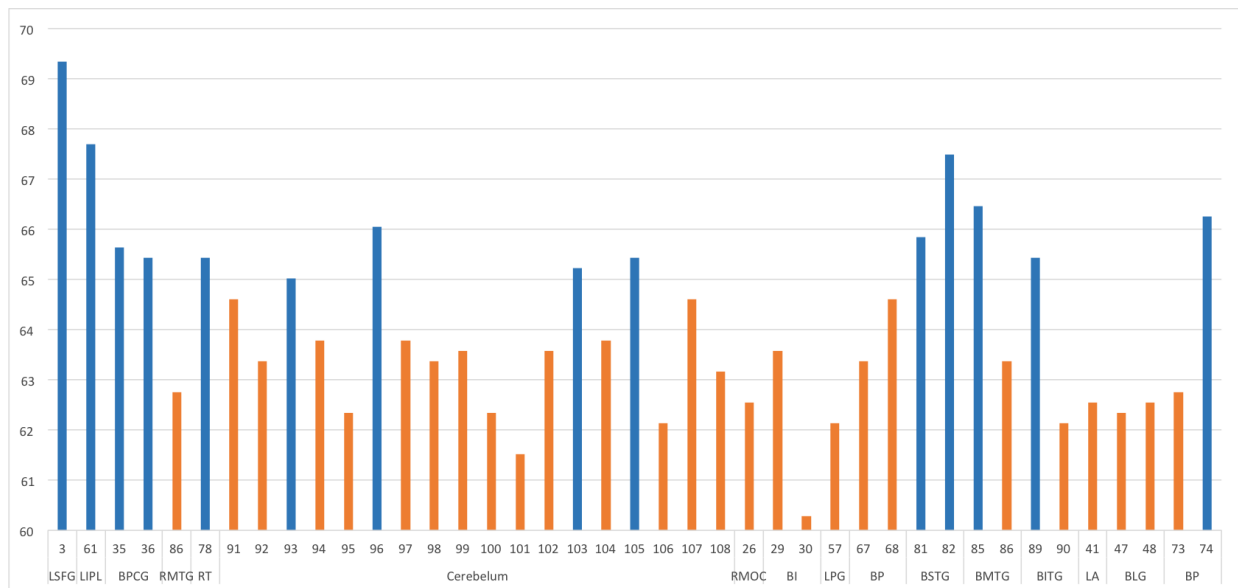

Figure S3: Classification accuracy of using single fMRI derived node data. X axis lists the abbreviation and Region ID of included ROIs (Table S1). Y axis is the classification accuracy with disconnected graphs constructed from fMRI data on single nodes. Blue ones are nodes that yield accuracy higher than 65%.
